# Supplementary material for: Promoting Barrier Performance and Cathodic Protection of Zinc-Rich Epoxy Primer via Single-Layer Graphene
Source: MDPI journal article supplement (doi:10.3390/polym10060591), 2018-05-28

## SUPPLEMENTAL FIGURES AND FIGURE LEGENDS

**Supplementary Figure S1:** Images of modified graphene dispersed in three solutions: water, ethanol and dimethylbenzene.

**Supplementary Figure S2:** TEM image of a single-layer graphene.

**Supplementary Figure S3:** The cross sectional (a) SEM image and (b) elemental map for the freshly coated samples of Gr0.6-ZRPs before immersion in a 3 wt. % NaCl solution.

Supplementary Figure S1

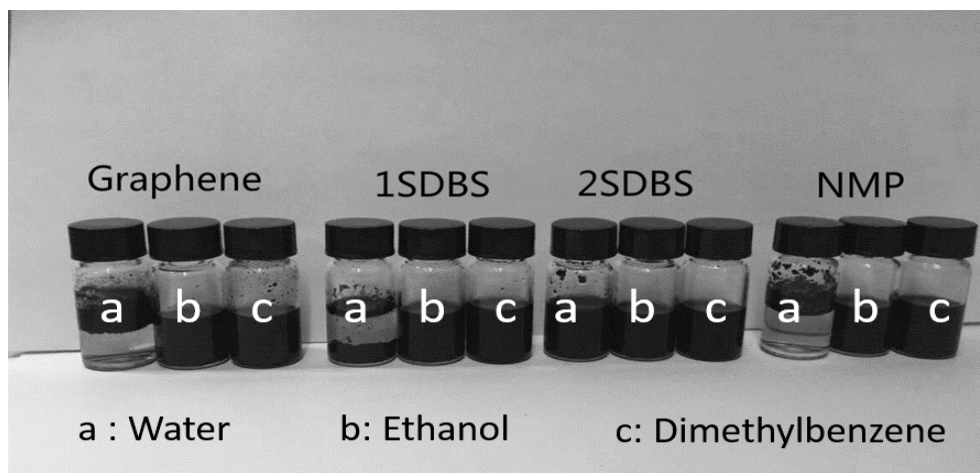

Supplementary Figure S2

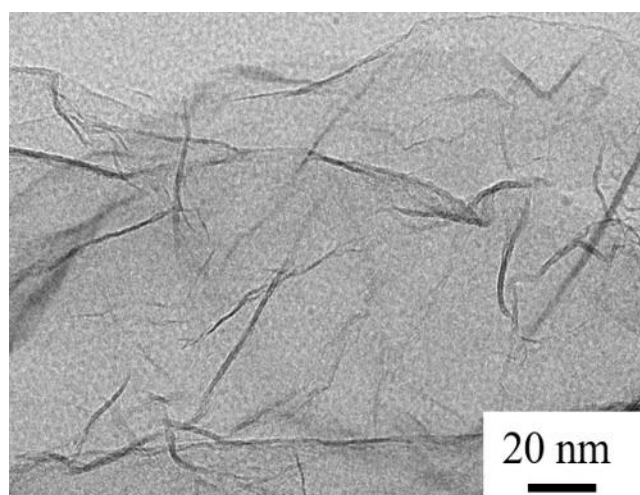

Supplementary Figure S3

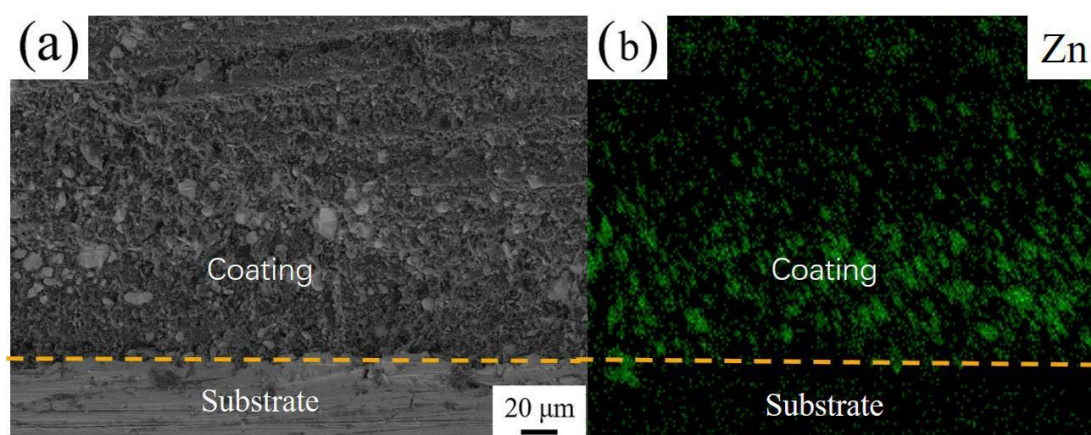

Supplement: s1 [file s1]
